# Supplementary material for: Riboflavin – understanding the dynamics and interactions of the triplet state
Source: Royal Society of Chemistry journal article supplement (doi:10.1039/d5cp03884g), 2025-12-22
Supplement: d5cp03884g2.pdf [file d5cp03884g2.pdf]

Supplementary information for paper

# Riboflavin – understanding the dynamics and interactions of the triplet state

Marek Scholz,<sup>a</sup> Jan Moučka,<sup>a</sup> Jakub Pšenčík,<sup>a</sup> Jan Hála<sup>a</sup> and Roman Dedic,<sup>a\*</sup>

## DF of riboflavin quenched by sodium azide

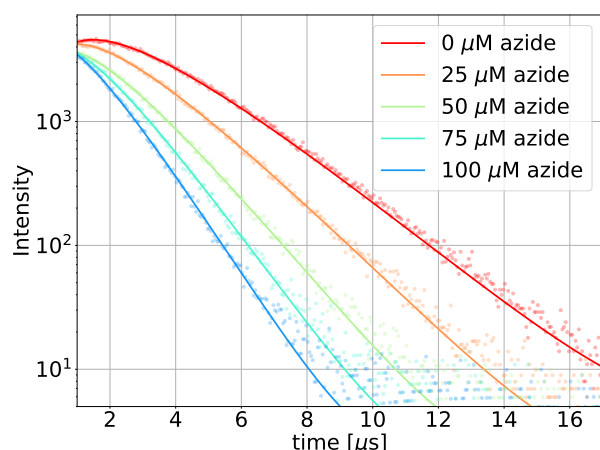

Fig. SI-1 Quenching of DF of riboflavin (50  $\mu\text{M}$ ) by sodium azide. The signal was fitted by a SOFDF kinetic model.

## DF of riboflavin quenched by sodium azide

| azide                 | $^1\text{O}_2$ lum.               |                                     | DF                                  |
|-----------------------|-----------------------------------|-------------------------------------|-------------------------------------|
| $c$ [ $\mu\text{M}$ ] | $\tau_{\Delta}$ [ $\mu\text{s}$ ] | $\tau_{\text{T}}$ [ $\mu\text{s}$ ] | $\tau_{\text{T}}$ [ $\mu\text{s}$ ] |
| 0                     | 3.7                               | 3.3                                 | 3.5                                 |
| 25                    | 3.6                               | 2.6                                 | 2.7                                 |
| 50                    | 3.5                               | 2.0                                 | 2.1                                 |
| 75                    | 3.3                               | 1.7                                 | 1.8                                 |
| 100                   | 3.2                               | 1.4                                 | 1.5                                 |

Table SI-1 Lifetimes of riboflavin triplet ( $\tau_{\text{T}}$ ) and  $^1\text{O}_2$  at increasing concentrations of sodium azide. The triplet lifetime was determined either by fitting the  $^1\text{O}_2$  infrared luminiscence or by fitting the riboflavin's DF decay by a SOFDF kinetic model. The triplets lifetimes obtained from the DF decay are consistent with those from  $^1\text{O}_2$  luminiscence. This further confirms that SOFDF mechanism is responsible for the formation of delayed fluorescence in our riboflavin samples.

## Delayed fluorescence spectrum

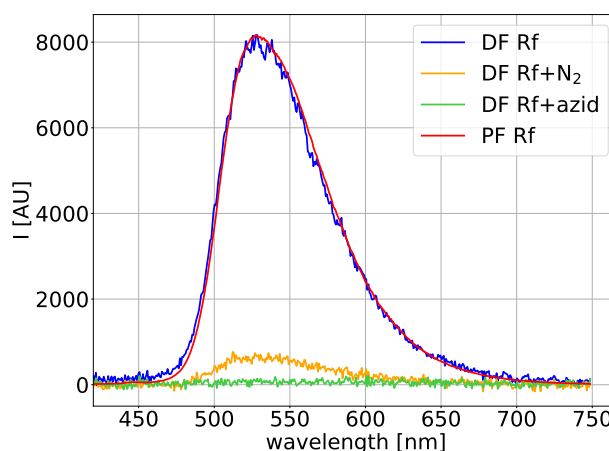

Fig. SI-2 Delayed fluorescence (DF) spectrum compared to prompt fluorescence (PF) spectrum of 50  $\mu\text{M}$  riboflavin detected by setup no. 3. The PF was collected within the first 20 ns after the excitation laser pulse (445 nm), whereas the DF was collected in the 1  $\mu\text{s}$ -5  $\mu\text{s}$  time interval. The spectrum of DF and PF are almost identical. The DF is suppressed in the presence of sodium azide and in a nitrogen-saturated sample, which is consistent with the SOFDF mechanism.

<sup>a</sup> Charles University, Faculty of Mathematics and Physics, Department of Chemical Physics and Optics, Prague, The Czech Republic.

\* Tel. +420 95155 1234; E-mail: Roman.Dedic@matfyz.cuni.cz

## Singlet-singlet vs. triplet-triplet energy transfer

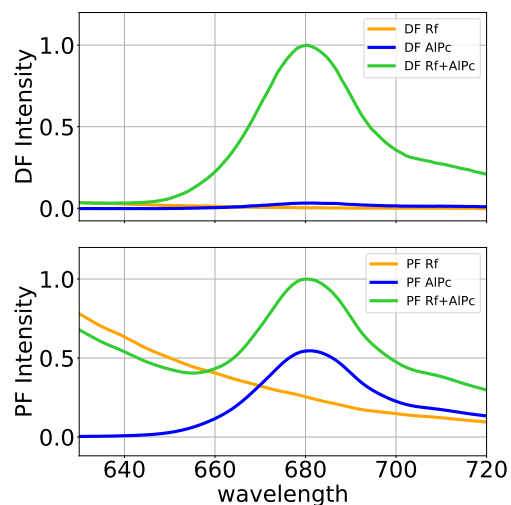

Fig. SI-3 Delayed fluorescence (DF) and prompt fluorescence (PF) of 1) Rf, 2) AIPc, 3) mixture of Rf + AIPc, all at  $50\mu\text{M}$ . The sample was excited at 445 nm (Rf absorption) and signal was detected in the red region (AIPc fluorescence) using setup no. 2. It can be clearly seen that the DF of AIPc is dramatically enhanced in the presence of riboflavin, whereas the PF of AIPc is enhanced only mildly. This indicates that the energy transfer from  $^3\text{Rf}^*$  to  $^3\text{AIPc}$  happens on microsecond time-scales that are typical for the triplet-triplet energy transfer. In contrast, a singlet-singlet energy transfer that happens on nanosecond time-scales cannot account for the dramatic enhancement of AIPc DF.

## Energy transfer from Rf to $10\mu\text{M}$ AIPc

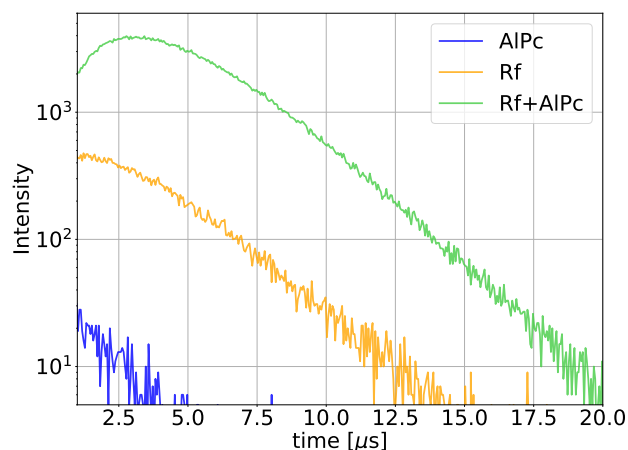

Fig. SI-4 The figure documents that the dramatic enhancement of AIPc delayed fluorescence in presence of riboflavin ( $50\mu\text{M}$ ) is clearly visible also at lower AIPc concentrations, here  $10\mu\text{M}$ . The sample was excited at 445 nm (Rf absorption) and signal was detected around 690 nm (AIPc fluorescence) using setup no. 1.
